# Supplementary material for: SYK gain-of-function mutation regulates neutrophil functions to drive spontaneous psoriasis
Source: Research Square preprint supplement (doi:10.21203/rs.3.rs-8234680/v1), 2025-12-08
Supplement: Supplementary file 1 [file 9b207d63b497f40386fd1dc2.docx]

| Gene name | Primer sequence |
| --- | --- |
| mus-GAPDH-F | 5’-ATGCCAAAGTTGTCATGGAT-3’ |
| mus-GAPDH-R | 5’-ATGTTTGTGATGGGTGTGAA-3’ |
| mus-Tnf-α-F | 5’-GGCGGTGCCTATGTCTCA-3’ |
| mus-Tnf-α-R | 5’-GGTTGACTTTCTCCTGGTATGA-3’ |
| mus-Il-17a-F | 5’-TCAGACTACCTCAACCGTTCC-3’ |
| mus-Il-17a-R | 5’-GGTGGTCCAGCTTTCCCT-3’ |
| mus-Il-23-F | 5’-CCCGTATCCAGTGTGAAGATG-3’ |
| mus-Il-23-R | 5’-GGCTCCCCTTTGAAGATGTC-3’ |
| mus-S100a8-F | 5’-AGTGTCCTCAGTTTGTGCAG-3’ |
| mus-S100a8-R | 5’-ACTCCTTGTGGCTGTCTTTG-3’ |
| mus-S100a9-F | 5’-ATACTCTAGGAAGGAAGGACACC-3’ |
| mus-S100a9-R | 5’-TCCATGATGTCATTTATGAGGGC-3’ |
| mus-Cxcl1-F | 5’-AGAACATCCAGAGCTTGAAGG-3’ |
| mus-Cxcl1-R | 5’-CAATTTTCTGAACCAAGGGAGC-3’ |
| mus-Il-1β-F | 5’-ACGGACCCCAAAAGATGAAG-3’ |
| mus-Il-1β-R | 5’-TTCTCCACAGCCACAATGAG-3’ |
| mus-Il-6-F | 5’-CAAAGCCAGAGTCCTTCAGAG-3’ |
| mus-Il-6-R | 5’-GTCCTTAGCCACTCCTTCTG-3’ |

**Supplementary Table 1: Primers used in this study**
